# Supplementary material
Source: PubMed Central journal article supplement (PMC5803324)
Supplement: NIHMS905857-supplement-supplement_1.pdf [file NIHMS905857-supplement-supplement_1.pdf]

Supplementary Table 1. Previous studies evaluating the association between early life factors and EoE

| Study                           | Study population                                                   | n                                       | Early life factor               | Direction of association  |
|---------------------------------|--------------------------------------------------------------------|-----------------------------------------|---------------------------------|---------------------------|
| Jensen et al. 2013 <sup>1</sup> | Hospital-based cases and controls (non-GI and GI*)                 | 31 cases, 26 controls (age 1-17 yrs.)   | Antibiotic use                  | +                         |
|                                 |                                                                    |                                         | Cesarean delivery               | +                         |
|                                 |                                                                    |                                         | Breastfeeding (exclusive)       | -                         |
|                                 |                                                                    |                                         | Maternal smoking/postnatal ETS  | No association (maternal) |
|                                 |                                                                    |                                         | Acid suppressants               | Not reported              |
|                                 |                                                                    |                                         | Pets in home                    | Not reported              |
| Radano et al. 2014 <sup>2</sup> | Hospital-based cases and controls (non-GI)                         | 25 cases, 74 controls (age 1-5 yrs.)    | Antibiotic use                  | +                         |
|                                 |                                                                    |                                         | Cesarean delivery               | +                         |
|                                 |                                                                    |                                         | Breastfeeding (any)             | No association            |
|                                 |                                                                    |                                         | Maternal smoking/ postnatal ETS | Not reported              |
|                                 |                                                                    |                                         | Acid suppressants               | Not reported              |
|                                 |                                                                    |                                         | Pets in home                    | Not reported              |
| Slae et al. 2015 <sup>3</sup>   | Hospital-based cases and controls (GI functional disease controls) | 102 cases, 167 controls (age 1-18 yrs.) | Antibiotic use                  | No association            |
|                                 |                                                                    |                                         | Cesarean delivery               | Not reported              |
|                                 |                                                                    |                                         | Breastfeeding (exclusive)       | No association            |
|                                 |                                                                    |                                         | Maternal smoking/ postnatal ETS | - (postnatal exposure)    |
|                                 |                                                                    |                                         | Acid suppressants               | Not reported              |
|                                 |                                                                    |                                         | Pets in home                    | No association            |
| Jensen et al. 2016 <sup>4</sup> | Hospital-based cases and population-based controls                 | 127 cases, 121 controls (ages 1-18)     | Antibiotic use                  | +                         |
|                                 |                                                                    |                                         | Cesarean delivery               | +                         |
|                                 |                                                                    |                                         | Breastfeeding (exclusive)       | No association            |
|                                 |                                                                    |                                         | Maternal smoking/ postnatal ETS | No association (maternal) |
|                                 |                                                                    |                                         | Acid suppressants               | +                         |
|                                 |                                                                    |                                         | Pets in home                    | -                         |

\*GI controls were functional disease controls (GERD) and were identified to not adequately represent the underlying source population giving rise to the cases

Supplementary Table 2. Quality control and minor allele frequencies of study SNPs

| Chromosome | Gene                                        | SNP        | Minor allele | Missing rate* | HWE**  |        |         | MAF†   |         |
|------------|---------------------------------------------|------------|--------------|---------------|--------|--------|---------|--------|---------|
|            |                                             |            |              |               | ALL    | EoE    | Control | EoE    | Control |
| 2          | <i>CAPN14</i>                               | rs6736278  | A            | 0.0007968     | 0.6509 | 1      | 0.7615  | 0.0778 | 0.0616  |
| 5          | <i>TSLP</i>                                 | rs3806932  | G            | 0.0007968     | 0.5596 | 0.1808 | 1       | 0.3563 | 0.4391  |
| 7          | <i>CCL26</i>                                | rs2302009  | C            | 0.0007968     | 0.4047 | 0.3782 | 0.7761  | 0.2489 | 0.2469  |
| 15         | <i>LOC283710</i> and<br><i>KLF13</i> region | rs17815905 | G            | 0             | 0.3504 | 0.5642 | 0.5785  | 0.2056 | 0.2559  |
| 19         | <i>TGF-β</i>                                | rs1800469  | A            | 0             | 0.4692 | 0.5171 | 0.6786  | 0.32   | 0.3062  |

\*Missing rate=proportion of alleles that were not genotyped

\*\*HWE=Hardy Weinberg Equilibrium

†MAF=Minor Allele Frequency

Supplementary Table 3. Case-only assessment of gene-environment interaction

|                         | <i>CAPN14</i><br>rs6736278<br>n=80 |                               | <i>TSLP</i><br>rs3806932<br>n=126 |                               | <i>CCL26</i><br>rs2302009<br>n=126 |                              | <i>LOC283710 and KLF13 region</i><br>rs17815905<br>n=126 |                               | <i>TGF-β</i><br>rs1800469<br>n=126 |                              |
|-------------------------|------------------------------------|-------------------------------|-----------------------------------|-------------------------------|------------------------------------|------------------------------|----------------------------------------------------------|-------------------------------|------------------------------------|------------------------------|
|                         | Crude OR<br>(95% CI); p            | aOR<br>(95% CI); p            | Crude OR<br>(95% CI); p           | aOR<br>(95% CI); p            | Crude OR<br>(95% CI); p            | aOR<br>(95% CI); p           | Crude OR<br>(95% CI); p                                  | aOR<br>(95% CI); p            | Crude OR<br>(95% CI); p            | aOR<br>(95% CI); p           |
| Cesarean delivery       |                                    |                               |                                   |                               |                                    |                              |                                                          |                               |                                    |                              |
| No                      | referent                           | referent                      | referent                          | referent                      | referent                           | referent                     | referent                                                 | referent                      | referent                           | referent                     |
| Yes                     | 0.53 (0.10, 2.72)<br>p=0.44        | 0.43 (0.08, 2.36)<br>p=0.33   | 0.92 (0.42, 2.00)<br>p=0.83       | 0.86 (0.38, 1.97)<br>p=0.73   | 1.95 (0.38, 10.10)<br>p=0.43       | 2.08 (0.36, 11.95)<br>p=0.41 | 1.01 (0.48, 2.11)<br>p=0.98                              | 1.06 (0.49, 2.26)<br>p=0.89   | 0.94 (0.27, 3.31)<br>p=0.92        | 0.97 (0.26, 3.61)<br>p=0.96  |
| Preterm delivery        |                                    |                               |                                   |                               |                                    |                              |                                                          |                               |                                    |                              |
| No                      | referent                           | referent                      | referent                          | referent                      | referent                           | referent                     | referent                                                 | referent                      | referent                           | referent                     |
| Yes                     | 1.07 (0.20, 5.68)<br>p=0.94        | 0.80 (0.14, 4.68)<br>p=0.81   | 0.86 (0.33, 2.29)<br>p=0.77       | 1.03 (0.37, 2.88)<br>p=0.95   | not estimable                      | not estimable                | 0.52 (0.21, 1.30)<br>p=0.16                              | 0.53 (0.21, 1.35)<br>p=0.18   | 0.90 (0.18, 4.39)<br>p=0.89        | 1.05 (0.21, 5.29)<br>p=0.95  |
| NICU admission          |                                    |                               |                                   |                               |                                    |                              |                                                          |                               |                                    |                              |
| No                      | referent                           | referent                      | referent                          | referent                      | referent                           | referent                     | referent                                                 | referent                      | referent                           | referent                     |
| Yes                     | 1.07 (.20, 5.68)<br>p=0.94         | 0.78 (0.13, 4.84)<br>p=0.79   | 2.73 (1.11, 6.67)<br>p=0.03       | 2.46 (0.97, 6.23)<br>p=0.06** | 0.81 (0.09, 7.25)<br>p=0.85        | 0.66 (0.07, 6.26)<br>p=0.72  | 0.35 (0.14, 0.86)<br>p=0.02                              | 0.34 (0.13, 0.85)<br>p=0.02** | 0.80 (0.16, 3.91)<br>p=0.78        | 0.78 (0.16, 3.90)<br>p=0.76  |
| Breastfed               |                                    |                               |                                   |                               |                                    |                              |                                                          |                               |                                    |                              |
| No                      | referent                           | referent                      | referent                          | referent                      | referent                           | referent                     | referent                                                 | referent                      | referent                           | referent                     |
| Yes                     | 0.15 (0.03, 0.63)<br>p=0.01        | 0.16 (0.04, 0.71)<br>p=0.02** | 0.85 (0.34, 2.13)<br>p=0.73       | 0.71 (0.27, 1.85)<br>p=0.48   | 0.99 (0.11, 9.16)<br>p=0.99        | 0.99 (0.11, 9.16)<br>p=0.99  | 1.55 (0.64, 3.72)<br>p=0.33                              | 1.52 (0.63, 3.70)<br>p=0.36   | 1.25 (0.26, 6.10)<br>p=0.78        | 1.11 (0.22, 5.52)<br>p=0.78  |
| Antibiotics in infancy* |                                    |                               |                                   |                               |                                    |                              |                                                          |                               |                                    |                              |
| No                      | referent                           | referent                      | referent                          | referent                      | referent                           | referent                     | referent                                                 | referent                      | referent                           | referent                     |
| Yes                     | not estimable                      | not estimable                 | 0.47 (0.17, 1.28)<br>p=0.14       | 0.43 (0.15, 1.26)<br>p=0.12   | 1.08 (0.12, 9.85)<br>p=0.94        | 1.07 (0.12, 9.93)<br>p=0.95  | 1.18 (0.44, 3.20)<br>p=0.74                              | 1.17 (0.43, 3.17)<br>p=0.76   | 2.57 (0.31, 21.21)<br>p=0.38       | 2.55 (0.31, 21.14)<br>p=0.38 |
| Cats or dogs in infancy |                                    |                               |                                   |                               |                                    |                              |                                                          |                               |                                    |                              |
| Yes                     | referent                           | referent                      | referent                          | referent                      | referent                           | referent                     | referent                                                 | referent                      | referent                           | referent                     |
| No                      | 1.22 (0.30, 4.90)<br>p=0.78        | 1.20 (0.29, 4.93)<br>p=0.80   | 1.93 (0.90, 4.14)<br>p=0.09       | 2.22 (1.00, 4.91)<br>p=0.05** | 0.42 (0.07, 2.36)<br>p=0.32        | 0.44 (0.08, 2.53)<br>p=0.36  | 1.21 (0.60, 2.44)<br>p=0.60                              | 1.20 (0.59, 2.43)<br>p=0.64   | 1.83 (0.52, 6.43)<br>p=0.34        | 1.88 (0.53, 6.63)<br>p=0.33  |

\*21 missing antibiotic use in infancy

\*\*assumption of independence tested – Supplementary Table 4

Supplementary Table 4. Test of independence assumption for case only design\*

|                         | <i>CAPN14</i> and breastfeeding<br>aOR (95% CI); p | <i>TSLP</i> and NICU admission<br>aOR (95% CI); p | <i>TSLP</i> and no furry pets<br>aOR (95% CI); p | <i>LOC283710</i> and <i>KLF13</i> region<br>and NICU admission<br>aOR (95% CI); p |
|-------------------------|----------------------------------------------------|---------------------------------------------------|--------------------------------------------------|-----------------------------------------------------------------------------------|
| Association in cases    | 0.16 (0.04, 0.71); p=0.02                          | 2.46 (0.97, 6.23); p=0.06                         | 2.22 (1.00, 4.91); p=0.05                        | 0.34 (0.13, 0.85); p=0.02                                                         |
| Association in controls | 2.22 (0.46, 10.67); p=0.32                         | 0.74 (0.41, 1.34); p=0.89                         | 0.80 (0.37, 1.77); p=0.59                        | 1.98 (0.56, 7.00); p=0.29                                                         |

\*for those with  $p \leq 0.10$  in case-only test of interaction - models include adjustment for maternal education and population stratification

## References

1. Jensen ET, Kappelman MD, Kim HP, et al. Early life exposures as risk factors for pediatric eosinophilic esophagitis. *J Pediatr Gastroenterol Nutr* 2013;57:67-71.
2. Radano MC, Yuan Q, Katz A, et al. Cesarean section and antibiotic use found to be associated with eosinophilic esophagitis. *J Allergy Clin Immunol Pract* 2014;2:475-477 e1.
3. Slae M, Persad R, Leung A-T, et al. Role of Environmental Factors in the Development of Pediatric Eosinophilic Esophagitis. *Digestive Diseases and Sciences* 2015:1-9.
4. Jensen ET, Kuhl JT, Martin L, et al. 664 Prenatal, Antenatal, and Early Life Factors Are Associated With Risk of Eosinophilic Esophagitis. *Gastroenterology*;150:S135-S136.
